# Supplementary material for: Mites Associated with the European Spruce Bark Beetle Ips typographus (Linnaeus, 1758) in Europe, with New Evidence for the Fauna of Serbia
Source: MDPI journal article supplement (doi:10.3390/f13101586), 2022-09-28
Supplement: s1 [file s1]

**Table S1.** The diversity of mites reported from various European countries.

| Species                                                       | Bulgaria | Croatia | Czechia | Finland | Georgia | Germany | Poland | Roma<br>nia | Ru<br>ssi<br>a | Slo<br>vak<br>ia | Sw<br>ede<br>n | Tu<br>rke<br>y |
|---------------------------------------------------------------|----------|---------|---------|---------|---------|---------|--------|-------------|----------------|------------------|----------------|----------------|
| <i>Adoristes ovatus</i> (C. L. Koch, 1839)                    | 0        | 0       | 0       | 0       | 0       | 1       | 0      | 0           | 0              | 0                | 0              | 0              |
| <i>Aethiophenax ipidarius</i> (Redikortsev, 1947)             | 0        | 0       | 0       | 1       | 0       | 1       | 0      | 0           | 1              | 0                | 1              | 0              |
| <i>Ameroseius sculptilis</i> Berlese, 1916                    | 0        | 0       | 0       | 0       | 0       | 0       | 1      | 0           | 0              | 0                | 0              | 0              |
| <i>Bakerdania hylophila</i> (Cooreman, 1963)                  | 0        | 0       | 0       | 0       | 0       | 1       | 0      | 0           | 1              | 0                | 0              | 0              |
| <i>Boletoglyphus boletophagi</i> (Türk, 1952)                 | 0        | 0       | 0       | 1       | 0       | 0       | 0      | 0           | 1              | 0                | 0              | 0              |
| <i>Bonomoia pini</i> Scheucher, 1957                          | 0        | 0       | 0       | 1       | 0       | 0       | 0      | 0           | 0              | 0                | 0              | 0              |
| <i>Carabodes labyrinthicus</i> (Michael, 1879)                | 0        | 0       | 0       | 1       | 0       | 1       | 0      | 0           | 0              | 0                | 1              | 0              |
| <i>Cepheus latus</i> C. L. Koch, 1835                         | 0        | 0       | 0       | 1       | 0       | 0       | 0      | 0           | 0              | 0                | 0              | 0              |
| <i>Ceratoppia bipilis</i> (Hermann, 1804)                     | 0        | 0       | 0       | 1       | 0       | 0       | 0      | 0           | 0              | 0                | 0              | 0              |
| <i>Cercoleipus kuznetsov</i> Khaustov, 1997                   | 0        | 0       | 0       | 0       | 0       | 0       | 0      | 0           | 1              | 0                | 0              | 0              |
| <i>Chamobates borealis</i> (Trägårdh, 1902)                   | 0        | 0       | 0       | 1       | 0       | 0       | 0      | 0           | 0              | 0                | 0              | 0              |
| <i>Coleopygmephorus bogenschutzi</i> (Mahunka and Moser 1982) | 0        | 0       | 0       | 0       | 0       | 1       | 0      | 0           | 1              | 0                | 1              | 0              |
| <i>Coleopygmephorus typographus</i> Khaustov, 2017            | 0        | 0       | 0       | 0       | 0       | 0       | 0      | 0           | 1              | 0                | 0              | 0              |
| <i>Conchogneta traegardhi</i> (Forsslund, 1947)               | 0        | 0       | 0       | 1       | 0       | 0       | 0      | 0           | 0              | 0                | 0              | 0              |
| <i>Cymbaeremaeus cymba</i> (Nicolet, 1855)                    | 0        | 0       | 0       | 0       | 0       | 1       | 0      | 0           | 0              | 0                | 0              | 0              |
| <i>Dendrolaelaps disetosimilis</i> Hirschmann, 1960           | 0        | 0       | 0       | 0       | 0       | 0       | 0      | 0           | 1              | 0                | 0              | 0              |
| <i>Dendrolaelaps pini</i> Hirschmann, 1960                    | 0        | 0       | 0       | 0       | 0       | 0       | 0      | 0           | 1              | 0                | 0              | 0              |
| <i>Dendrolaelaps apophyseus</i> Hirschmann, 1960              | 0        | 0       | 0       | 0       | 1       | 0       | 0      | 0           | 0              | 0                | 0              | 0              |
| <i>Dendrolaelaps disetus</i> Hirschmann, 1960                 | 0        | 0       | 0       | 0       | 0       | 1       | 0      | 0           | 0              | 0                | 0              | 0              |
| <i>Dendrolaelaps pini</i> Hirschmann, 1960                    | 0        | 0       | 0       | 0       | 0       | 0       | 0      | 0           | 1              | 0                | 0              | 0              |
| <i>Dendrolaelaps quadrisetus</i> (Berlese, 1920)              | 1        | 1       | 1       | 0       | 1       | 1       | 1      | 1           | 1              | 1                | 1              | 1              |
| <i>Diapterobates humeralis</i> (Hermann, 1804)                | 0        | 0       | 0       | 1       | 0       | 0       | 0      | 0           | 0              | 0                | 0              | 0              |
| <i>Dolichocybe sibiriensis</i> Khaustov, 2017                 | 0        | 0       | 0       | 0       | 0       | 0       | 0      | 0           | 1              | 0                | 0              | 0              |

|                                                           |   |   |   |   |   |   |   |   |   |   |   |   |
|-----------------------------------------------------------|---|---|---|---|---|---|---|---|---|---|---|---|
| <i>Elattoma crossi</i> Khaustov, 2000                     | 0 | 0 | 0 | 0 | 0 | 0 | 0 | 0 | 1 | 0 | 0 | 0 |
| <i>Eporibatula gessneri</i> Willmann, 1932                | 0 | 0 | 0 | 0 | 0 | 1 | 0 | 0 | 0 | 0 | 0 | 0 |
| <i>Ereynetes scutulis</i> Hunter, 1964                    | 0 | 0 | 0 | 0 | 0 | 0 | 0 | 0 | 0 | 0 | 1 | 0 |
| <i>Ereynetes propescutulis</i> Hunter and Ro-sario, 1989  | 0 | 0 | 0 | 1 | 1 | 0 | 0 | 0 | 0 | 0 | 0 | 0 |
| <i>Forcellinia wasmanni</i> Khaustov, 2000                | 0 | 0 | 0 | 0 | 0 | 0 | 0 | 0 | 1 | 0 | 0 | 0 |
| <i>Gamasellodes tatricus</i> Gwiazdowicz and Walter, 2005 | 0 | 0 | 0 | 0 | 0 | 0 | 0 | 0 | 1 | 0 | 0 | 0 |
| <i>Heterotarsonemus lindquisti</i> Smiley, 1969           | 0 | 0 | 0 | 0 | 0 | 0 | 0 | 0 | 1 | 0 | 0 | 0 |
| <i>Histiogaster arborsignis</i> Woodring, 1963            | 0 | 0 | 0 | 0 | 0 | 1 | 0 | 0 | 0 | 0 | 0 | 0 |
| <i>Histiogaster ornatus</i> Volgin, 1966                  | 0 | 0 | 0 | 0 | 1 | 0 | 0 | 0 | 0 | 0 | 0 | 0 |
| <i>Histiostoma dryocoeti</i> Scheucher, 1957              | 0 | 0 | 0 | 0 | 0 | 1 | 0 | 0 | 0 | 0 | 0 | 0 |
| <i>Histiostoma ovalis</i> (Müller, 1860)                  | 0 | 0 | 0 | 0 | 0 | 0 | 0 | 0 | 1 | 0 | 0 | 0 |
| <i>Histiostoma piceae</i> (Scheucher, 1957)               | 1 | 1 | 0 | 0 | 0 | 1 | 0 | 1 | 1 | 0 | 1 | 0 |
| <i>Histiostoma pini</i> Scheucher, 1957                   | 0 | 0 | 0 | 0 | 0 | 0 | 0 | 0 | 1 | 0 | 0 | 0 |
| <i>Insectolaelaps quadrisetus</i> (Berlese, 1910)         | 0 | 0 | 0 | 1 | 0 | 0 | 0 | 0 | 0 | 0 | 0 | 0 |
| <i>Iponemus gaebleri</i> (Schaarschmidt, 1959)            | 0 | 1 | 0 | 0 | 0 | 1 | 0 | 0 | 1 | 0 | 1 | 0 |
| <i>Ipsoglyphus bochkovi</i> Klimov and Khaustov, 2018     | 0 | 0 | 0 | 0 | 0 | 0 | 0 | 0 | 1 | 0 | 0 | 0 |
| <i>Kuzinia laevis</i> (Dujardin, 1849)                    | 0 | 0 | 0 | 0 | 0 | 0 | 0 | 0 | 1 | 0 | 0 | 0 |
| <i>Lasioseius ometes</i> (Oudemans, 1903)                 | 0 | 0 | 0 | 0 | 0 | 0 | 1 | 0 | 0 | 0 | 0 | 0 |
| <i>Lasioseius penicilliger</i> Berlese, 1916              | 0 | 0 | 0 | 0 | 1 | 0 | 0 | 0 | 0 | 0 | 0 | 0 |
| <i>Leptogamasus suecicus</i> Trägardh, 1936               | 0 | 0 | 0 | 0 | 0 | 0 | 1 | 0 | 0 | 0 | 0 | 0 |
| <i>Macrocheles glaber</i> (Müller, 1860)                  | 0 | 0 | 0 | 0 | 0 | 0 | 1 | 0 | 0 | 0 | 0 | 0 |
| <i>Mexechesles virginiensis</i> (Baker, 1949)             | 0 | 0 | 0 | 1 | 0 | 0 | 0 | 0 | 1 | 0 | 0 | 0 |
| <i>Micreremus brevipes</i> (Michael, 1888)                | 0 | 0 | 0 | 1 | 0 | 0 | 0 | 0 | 0 | 0 | 0 | 0 |
| <i>Microdispodides moseri</i> Khaustov, 2018              | 0 | 0 | 0 | 0 | 0 | 0 | 0 | 0 | 1 | 0 | 0 | 0 |
| <i>Oppia splendens</i> (C. L. Koch, 1841)                 | 0 | 0 | 0 | 1 | 0 | 0 | 0 | 0 | 0 | 0 | 0 | 0 |
| <i>Oribatella calcarata</i> (C. L. Koch, 1835)            | 0 | 0 | 0 | 1 | 0 | 0 | 0 | 0 | 0 | 0 | 0 | 0 |
| <i>Paraleius lentonychus</i> (Berlese 1910)               | 0 | 0 | 0 | 1 | 0 | 1 | 0 | 0 | 1 | 0 | 1 | 0 |

|                                                                   |   |   |   |   |   |   |   |   |   |   |   |   |
|-------------------------------------------------------------------|---|---|---|---|---|---|---|---|---|---|---|---|
| <i>Parawinterschmidtia kneissli</i> (Krausse, 1919)               | 0 | 0 | 0 | 0 | 0 | 0 | 0 | 0 | 1 | 0 | 0 | 0 |
| <i>Phauloppia rauschenensis</i> (Sellnick, 1908)                  | 0 | 0 | 0 | 1 | 0 | 0 | 0 | 0 | 0 | 0 | 0 | 0 |
| <i>Phthiracarus nitens</i> (Nicolet, 1855)                        | 0 | 0 | 0 | 1 | 0 | 0 | 0 | 0 | 0 | 0 | 0 | 0 |
| <i>Pleuronectocelaeno austriaca</i> von Vitzthum, 1926            | 0 | 0 | 1 | 0 | 0 | 0 | 1 | 1 | 0 | 1 | 0 | 0 |
| <i>Pleuronectocelaeno barbara</i> Athias-Hentiot, 1959            | 0 | 0 | 0 | 0 | 0 | 1 | 0 | 0 | 1 | 0 | 1 | 0 |
| <i>Pleuronectocelaeno japonica</i> Kinn, 1991                     | 0 | 0 | 0 | 0 | 0 | 0 | 0 | 0 | 1 | 0 | 0 | 0 |
| <i>Poecilochirus carabi</i> G. Canestrini and R. Canestrini, 1882 | 0 | 0 | 0 | 0 | 0 | 0 | 1 | 0 | 0 | 0 | 0 | 0 |
| <i>Probonomoia pini</i> (Scheucher, 1957)                         | 0 | 0 | 0 | 0 | 0 | 0 | 0 | 0 | 1 | 0 | 0 | 0 |
| <i>Probonomoia sibirica</i> (Wirth, 2016)                         | 0 | 0 | 0 | 0 | 0 | 0 | 0 | 0 | 1 | 0 | 0 | 0 |
| <i>Proctolaelaps fiseri</i> (Samsinak, 1960)                      | 1 | 0 | 1 | 1 | 0 | 1 | 1 | 1 | 1 | 0 | 1 | 0 |
| <i>Proctolaelaps hystericoides</i> Lindquist and Hunter, 1965     | 0 | 0 | 0 | 0 | 0 | 0 | 0 | 0 | 1 | 0 | 0 | 0 |
| <i>Proctolaelaps jueradeus</i> (Schweizer, 1949)                  | 0 | 0 | 0 | 0 | 0 | 0 | 0 | 0 | 1 | 0 | 0 | 0 |
| <i>Pyemotes dryas</i> (von Vitzthum, 1923)                        | 0 | 0 | 0 | 0 | 0 | 1 | 0 | 0 | 0 | 0 | 1 | 0 |
| <i>Saproglyphus waldorfae</i> (Fain and Johnston, 1974)           | 0 | 0 | 0 | 0 | 0 | 0 | 0 | 0 | 1 | 0 | 0 | 0 |
| <i>Schizosthetus simulatrix</i> Athias-Henriot, 1982              | 0 | 0 | 1 | 0 | 0 | 0 | 0 | 0 | 0 | 0 | 0 | 1 |
| <i>Schwiebea nesbitti</i> F. Türk and E. Türk, 1957               | 0 | 0 | 0 | 0 | 0 | 0 | 0 | 0 | 1 | 0 | 0 | 0 |
| <i>Schwiebea nova</i> (Oudemans, 1906)                            | 0 | 0 | 0 | 0 | 0 | 0 | 0 | 0 | 1 | 0 | 0 | 0 |
| <i>Schwiebea scheucherae</i> F. Türk and E. Türk, 1957            | 0 | 0 | 0 | 0 | 0 | 0 | 0 | 0 | 1 | 0 | 0 | 0 |
| <i>Scutacarus muscocola</i> Sevastianov, 1983                     | 0 | 0 | 0 | 0 | 0 | 0 | 0 | 0 | 1 | 0 | 0 | 0 |
| <i>Scutacarus palustris</i> Rack, 1966                            | 0 | 0 | 0 | 0 | 0 | 0 | 0 | 0 | 1 | 0 | 0 | 0 |
| <i>Scutacarus pseudoplurisetus</i> Khaustov, 2017                 | 0 | 0 | 0 | 0 | 0 | 0 | 0 | 0 | 1 | 0 | 0 | 0 |
| <i>Scutacarus scolyti</i> Mahunka and Moser, 1982                 | 0 | 0 | 0 | 0 | 0 | 1 | 0 | 0 | 1 | 0 | 1 | 0 |
| <i>Superioropus huronmontanus</i> OConnor and Houck, 1989         | 0 | 0 | 0 | 0 | 0 | 0 | 0 | 0 | 1 | 0 | 0 | 0 |
| <i>Tarsonemus bistridentati</i> Magowski and Khaustov, 2006       | 0 | 0 | 0 | 0 | 0 | 0 | 0 | 0 | 1 | 0 | 0 | 0 |
| <i>Tarsonemus ips</i> Lindquist, 1969                             | 0 | 0 | 0 | 0 | 0 | 1 | 0 | 0 | 0 | 0 | 0 | 0 |

|                                                                     |   |   |   |   |   |   |   |   |   |   |   |   |
|---------------------------------------------------------------------|---|---|---|---|---|---|---|---|---|---|---|---|
| <i>Tarsonemus minimax</i> von Vitzthum, 1926                        | 0 | 0 | 0 | 0 | 0 | 1 | 0 | 0 | 0 | 0 | 0 | 0 |
| <i>Tarsonemus striatus</i> Khaustov, 2017                           | 0 | 0 | 0 | 0 | 0 | 0 | 0 | 0 | 1 | 0 | 0 | 0 |
| <i>Tarsonemus subcorticalis</i> Lindquist, 1969                     | 0 | 0 | 0 | 0 | 0 | 1 | 0 | 0 | 0 | 0 | 1 | 0 |
| <i>Tarsonemus typographi</i> Magowski and Moser, 2003               | 0 | 0 | 0 | 0 | 0 | 0 | 0 | 0 | 1 | 0 | 0 | 0 |
| <i>Thyreophagus corticalis</i> (Michael, 1885)                      | 0 | 0 | 0 | 0 | 0 | 1 | 0 | 0 | 1 | 0 | 1 | 0 |
| <i>Thyreophagus entomophagus</i> (Laboulbène and Robin, 1862)       | 0 | 0 | 0 | 0 | 0 | 0 | 0 | 0 | 1 | 0 | 0 | 0 |
| <i>Trichouropoda karawaiewi</i> (Berlese, 1904)                     | 0 | 0 | 0 | 0 | 0 | 0 | 0 | 0 | 1 | 1 | 0 | 0 |
| <i>Trichouropoda lamellosa</i> (Hirschmann, 1972)                   | 0 | 0 | 0 | 0 | 0 | 0 | 0 | 0 | 0 | 0 | 0 | 1 |
| <i>Trichouropoda orszaghi</i> Masan, 1999                           | 0 | 0 | 0 | 0 | 0 | 0 | 0 | 1 | 0 | 0 | 0 | 0 |
| <i>Trichouropoda ovalis</i> (C. L. Koch, 1839)                      | 0 | 0 | 0 | 0 | 0 | 0 | 1 | 0 | 0 | 0 | 0 | 0 |
| <i>Trichouropoda polonica</i> Wisniewski and Hirschmann, 1988       | 0 | 0 | 1 | 0 | 0 | 0 | 0 | 0 | 0 | 0 | 0 | 0 |
| <i>Trichouropoda polytricha</i> (von Vitzthum, 1923)                | 1 | 0 | 1 | 1 | 1 | 1 | 1 | 1 | 1 | 1 | 1 | 0 |
| <i>Trichouropoda sociata</i> (von Vitzthum, 1923)                   | 0 | 0 | 0 | 0 | 0 | 0 | 1 | 0 | 0 | 0 | 0 | 0 |
| <i>Trichouropoda structura</i> Hirschmann and Zirngiebl-Nicol, 1961 | 0 | 0 | 0 | 0 | 0 | 0 | 0 | 0 | 1 | 0 | 0 | 0 |
| <i>Tyrophagus putrescentiae</i> (Schrank, 1781)                     | 0 | 0 | 0 | 0 | 0 | 0 | 0 | 0 | 1 | 0 | 0 | 0 |
| <i>Urobovella pulchella</i> (Berlese, 1904)                         | 0 | 0 | 0 | 0 | 0 | 0 | 1 | 0 | 0 | 0 | 0 | 0 |
| <i>Urobovella feideri</i> Hutu, 1976                                | 0 | 0 | 0 | 0 | 0 | 0 | 0 | 0 | 0 | 1 | 0 | 0 |
| <i>Urobovella ipidis</i> (von Vitzthum, 1923)                       | 1 | 0 | 1 | 0 | 0 | 1 | 1 | 1 | 1 | 1 | 1 | 1 |
| <i>Urobovella obovata</i> G. Canestrini and Berlese, 1884           | 0 | 0 | 0 | 0 | 0 | 0 | 0 | 0 | 0 | 0 | 0 | 0 |
| <i>Urobovella vinicolora</i> (von Vitzthum, 1926)                   | 0 | 0 | 1 | 1 | 0 | 1 | 0 | 1 | 0 | 0 | 1 | 0 |
| <i>Vulgarogamasus oudemansi</i> (Berlese, 1904)                     | 0 | 0 | 0 | 0 | 0 | 0 | 1 | 1 | 0 | 0 | 0 | 0 |
| <i>Zygoribatula exilis</i> (Nicolet, 1855)                          | 0 | 0 | 0 | 1 | 0 | 0 | 0 | 0 | 0 | 0 | 0 | 0 |

## References

24. Wirth, S.F.; Weis, O.; Pernek, M. Comparison of phoretic mites associated with bark beetles *Ips typographus* and *Ips cembrae* from Central Croatia. *Sumar. List.* **2016**, *140*, 549–560.

---

<https://doi.org/10.31298/sl.140.11-12.2>

---

25. Burjanadze, M.; Moser, J.C.; Zimmermann, G.; Kleespies, R.G. Antagonists of the spruce bark beetle *Ips typographus* L. (Coleoptera: Scolytidae) of German and Georgian populations. *Insect Pathogens and Insect Parasitic Nematodes IOBC/wprs Bull.* **2008**, *31*, 245–250.

---

28. Moser, J.C.; Bogenschütz, H. A Key to the Mites Associated with Flying *Ips typographus* in South Germany. *Z. Angew. Entomol.* **1984**, *97*, 437–450.

---

31. Gwiazdowicz, D.J.; Kamczyc, J.; Błoszyk, J. The diversity of phoretic Mesostigmata on *Ips typographus* (Coleoptera: Scolytinae) caught in the Karkonosze forest. *Eur. J. Entomol.* **2011**, *108*, 489–491.

---

32. Gwiazdowicz, D.; Kamczyc, J.; Teodorowicz, E.; Błoszyk, J. Mite Communities (Acari, Mesostigmata) Associated with *Ips typographus* (Coleoptera, Scolytidae) in Managed and Natural Norway Spruce Stands in Central Europe. *Open Life Sci.* **2012**, *7*(5), 910–916. <https://doi.org/10.2478/s11535-012-0070-z>

---

33. Paraschiv, M.; Isaia, G. Disparity of Phoresy in Mesostigmatid Mites upon Their Specific Carrier *Ips typographus* (Coleoptera: Scolytinae). *Insects* **2020**, *11*, 771. <https://doi.org/10.3390/insects11110771>

---

41. Takov, D.; Pilarska, D.; Moser, J. Phoretic mites associated with spruce bark beetle *Ips typographus* L. (Curculionidae: Scolytinae) from Bulgaria. *Acta Zool. Bulg.* **2009**, *61*, 293–296.

---

43. Vrabec, M.; Kalúz, S.; Ferenčík, J. Foretické roztoče na lykožrútovi smrekovom (*Ips typographus*) na vybraných lokalitách vo Vysokých Tatrách. *Entomofauna carpath.* **2012**, *24*, 1–14.

---

44. Čejka, M.; Holuša, J. Phoretic mites in uni- and bivoltine populations of *Ips typographus*: A 1-year case study. *Turk. J. Zool.* **2014**, *38*, 569–574. <https://doi.org/10.3906/zoo-1309-20>

---

47. Khaustov, A.A.; Klimov, P.B.; Trach, A.V.; Bobylev, A.N.; Salavatulin, V.M.; Khaustov, A.V.; Tolstikov, A.V. Review of mites (Acari) associated with the European spruce bark beetle, *Ips typographus* (Coleoptera: Curculionidae: Scolytinae) in Asian Russia. *Acarina* **2018**, *26*, 137–151. <https://doi.org/10.21684/0132-8077-2018-26-1-3-79>.

---

50. Penttinen, R.; Viiri, H.; Moser, J.C. The Mites (Acari) Associated with Bark Beetles in the Koli National Park in Finland. *Acarologia* **2013**, *53*, 3–15.

---

51. Poliță, D.; Manu, M.; Marcu, V.M. Relationship among phoretic mites and Norway spruce bark beetles – *Ips typographus* and *Pityogenes chalcographus*. *Rev. Păd.* **2016**, *131*, 57–65.

---

52. Cilbircioğlu, C.; Kovač, M.; Pernek, M. Associations of Phoretic Mites on Bark Beetles of the Genus *Ips* in the Black Sea Mountains of Turkey. *Forests* **2021**, *12*, 516. <https://doi.org/10.3390/f12050516>

---

56. Moser, J.C.; Eidmann, H.H.; Regnander, J.R. The mites associated with *Ips typographus* in Sweden. *Ann. Zool. Fenn.* **1989**, *55*, 23–27.

---
